# Supplementary material for: Amyloid aggregates accumulate in melanoma metastasis modulating YAP activity
Source: PubMed Central journal article supplement (PMC7507035; doi:10.15252/embr.202050446), 2020-08-04

Source data Figure EV 4 D

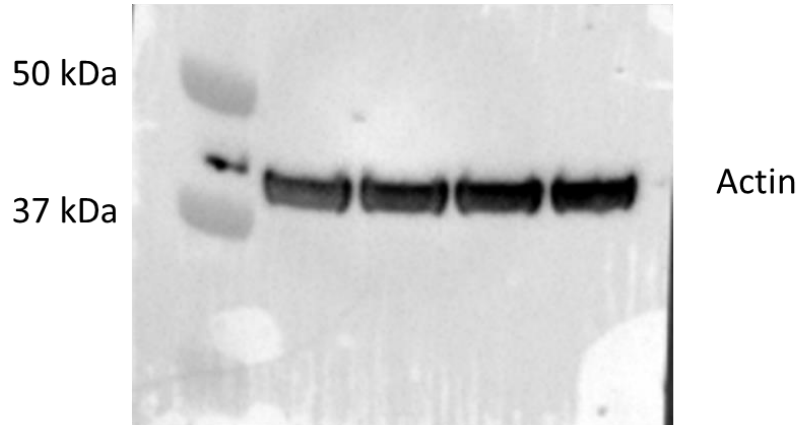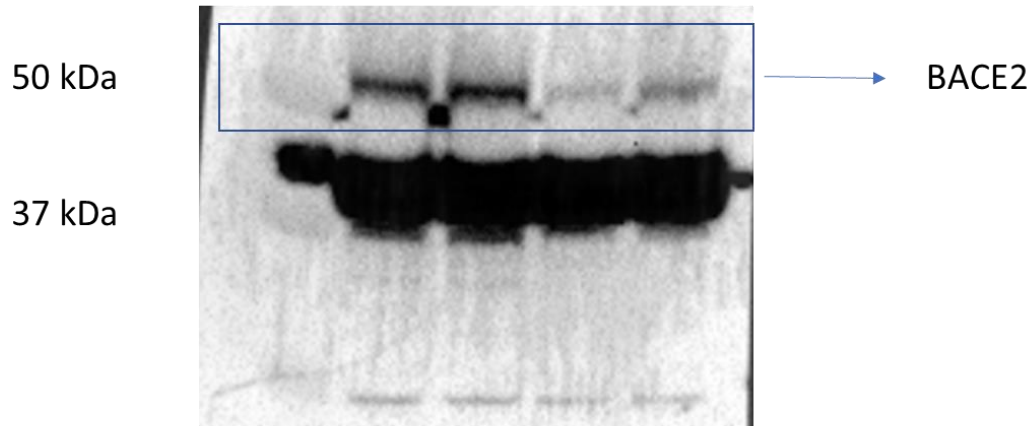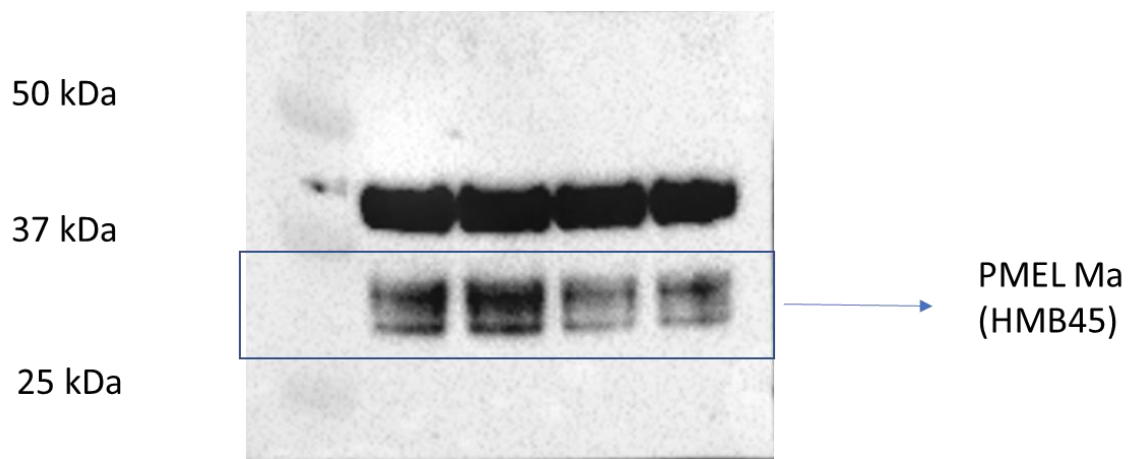

Source Data for Figure EV 4M

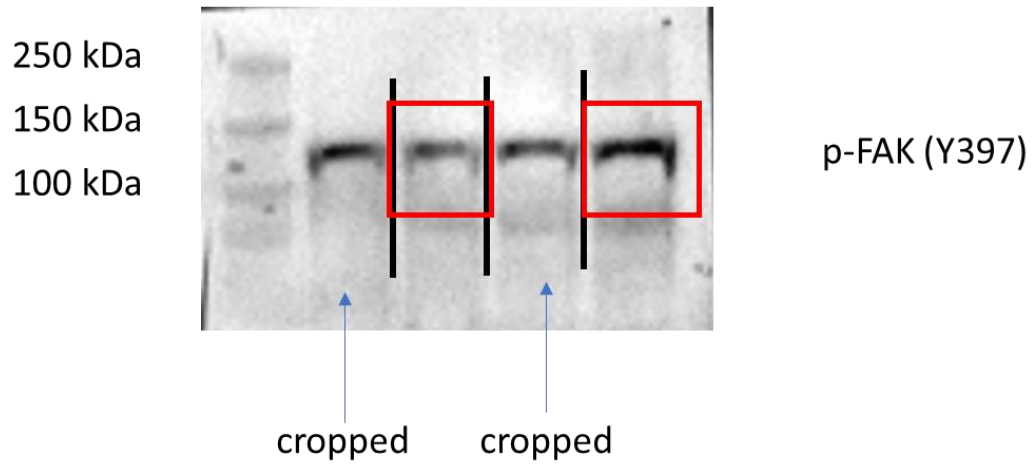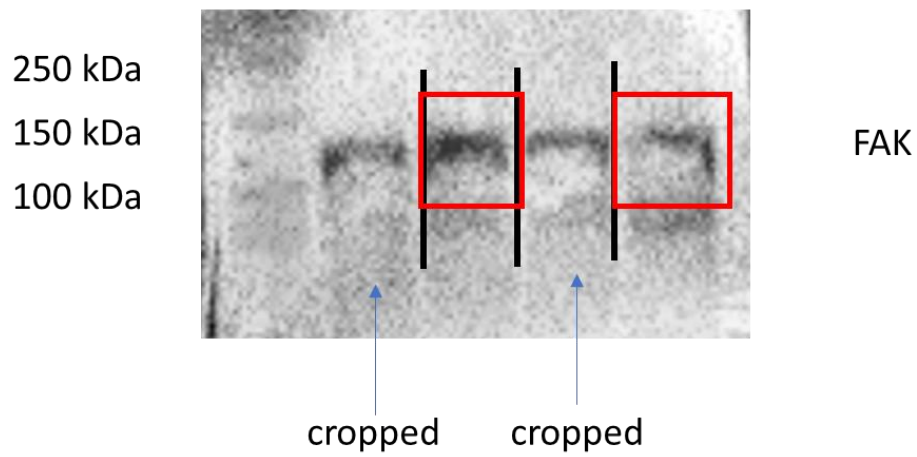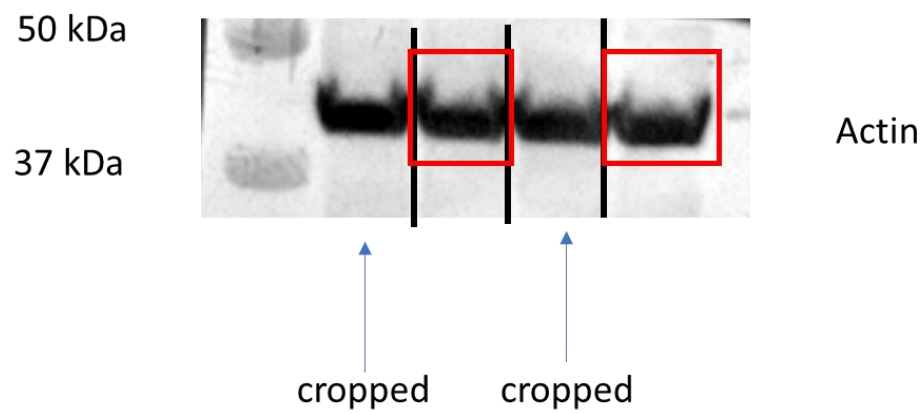

Supplement: EMBR-21-e50446-s016.pdf [file EMBR-21-e50446-s016.pdf]
